# Supplementary material
Source: PubMed Central journal article supplement (PMC10239099)

**Additional file 1**

**Table S1.** Keywords for databases

The final keyword combinations on the different databases are as follows:

|                                                                                                                                                                                                                                                                                                                                                                                       |
|---------------------------------------------------------------------------------------------------------------------------------------------------------------------------------------------------------------------------------------------------------------------------------------------------------------------------------------------------------------------------------------|
| <p>1. PubMed: 197 HITS</p> <p>Keywords were combined using “I” AND “II” AND “III” AND “IV”.</p> <p>Where:</p> <p>I: “Caesarean section OR Cesarean delivery OR Caesarean section OR Cesarean delivery OR C-section OR CS”</p> <p>II: “Prevalence” OR “Rate” OR “Trend”</p> <p>III: “Outcomes” OR “Effects” OR “Impacts” OR “Consequences” OR “Complications”</p> <p>IV: “Nigeria”</p> |
| <p>2. African Journals Online (AJOL)</p> <p>“Prevalence”, “Complication”, “Indication”, “C-section”, “Nigeria” 2110 HITS</p> <p>“Caesarean Section” Indications Prevalence Outcome “Nigeria” 460 HITS</p>                                                                                                                                                                             |
| <p>3. Directory of Open Access Journals (DOAJ)</p> <p>‘Indications OR Prevalence OR Complications’ “Caesarean Section” “Nigeria” 99 HITS</p>                                                                                                                                                                                                                                          |
| <p>4. Google Scholar</p> <p>“Prevalence of caesarean” AND “Outcome” AND “Nigeria” 192 HITS</p> <p>“Prevalence of caesarean” AND “indications” AND “Nigeria” 146 HITS</p>                                                                                                                                                                                                              |
| <p>5. EBSCOhost</p> <p>“Prevalence of caesarean” AND “Outcome” AND “Nigeria” 120 HITS</p> <p>“Prevalence”, “Complication”, “Indication”, “C-section”, “Nigeria” 155 HITS</p> <p>“Prevalence of caesarean” AND “complication” AND “Nigeria” 45 HITS</p> <p>“Prevalence of caesarean” AND “indications” AND “Nigeria” 66 HITS</p>                                                       |

### Influential analysis

The leave-one-study-out analysis was used to determine if a single study could significantly influence the pooled prevalence of caesarean section (CS) in this review. The absence of a red point in Cooks distance measure indicates the absence of any influential studies.

Figure S1. Investigating the presence of influential studies

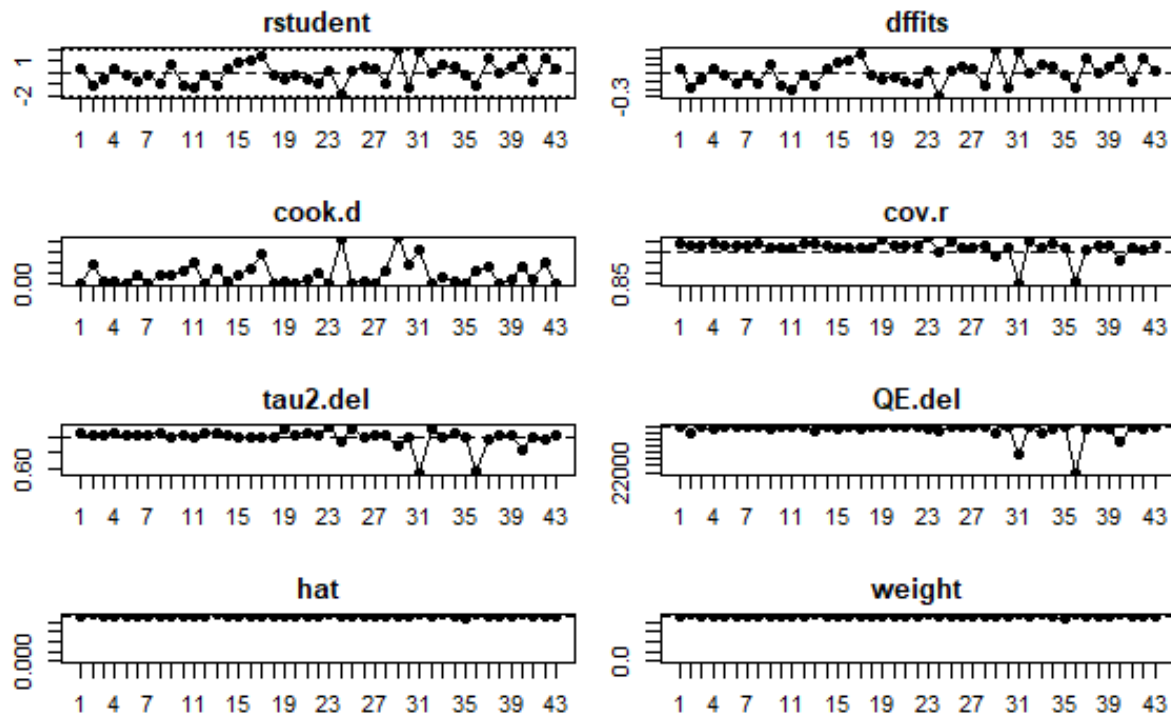

### Region (North and South) and type of caesarean section (Elective and Emergency)

The pooled prevalence of elective CS was 20.64% (95%CI=16.07 to 26.11) and 26.87% (95%CI=21.37 to 33.20) in health facilities in the north and south of Nigeria, respectively. On the other hand, the pooled prevalence of emergency CS was 79.03% (95%CI= 73.46 to 83.68) and 72.91% (95%CI= 66.56 to 78.45), in the north and south of Nigeria, respectively.

Figure S2: Forest plot of the prevalence of caesarean section by region and type of caesarean section

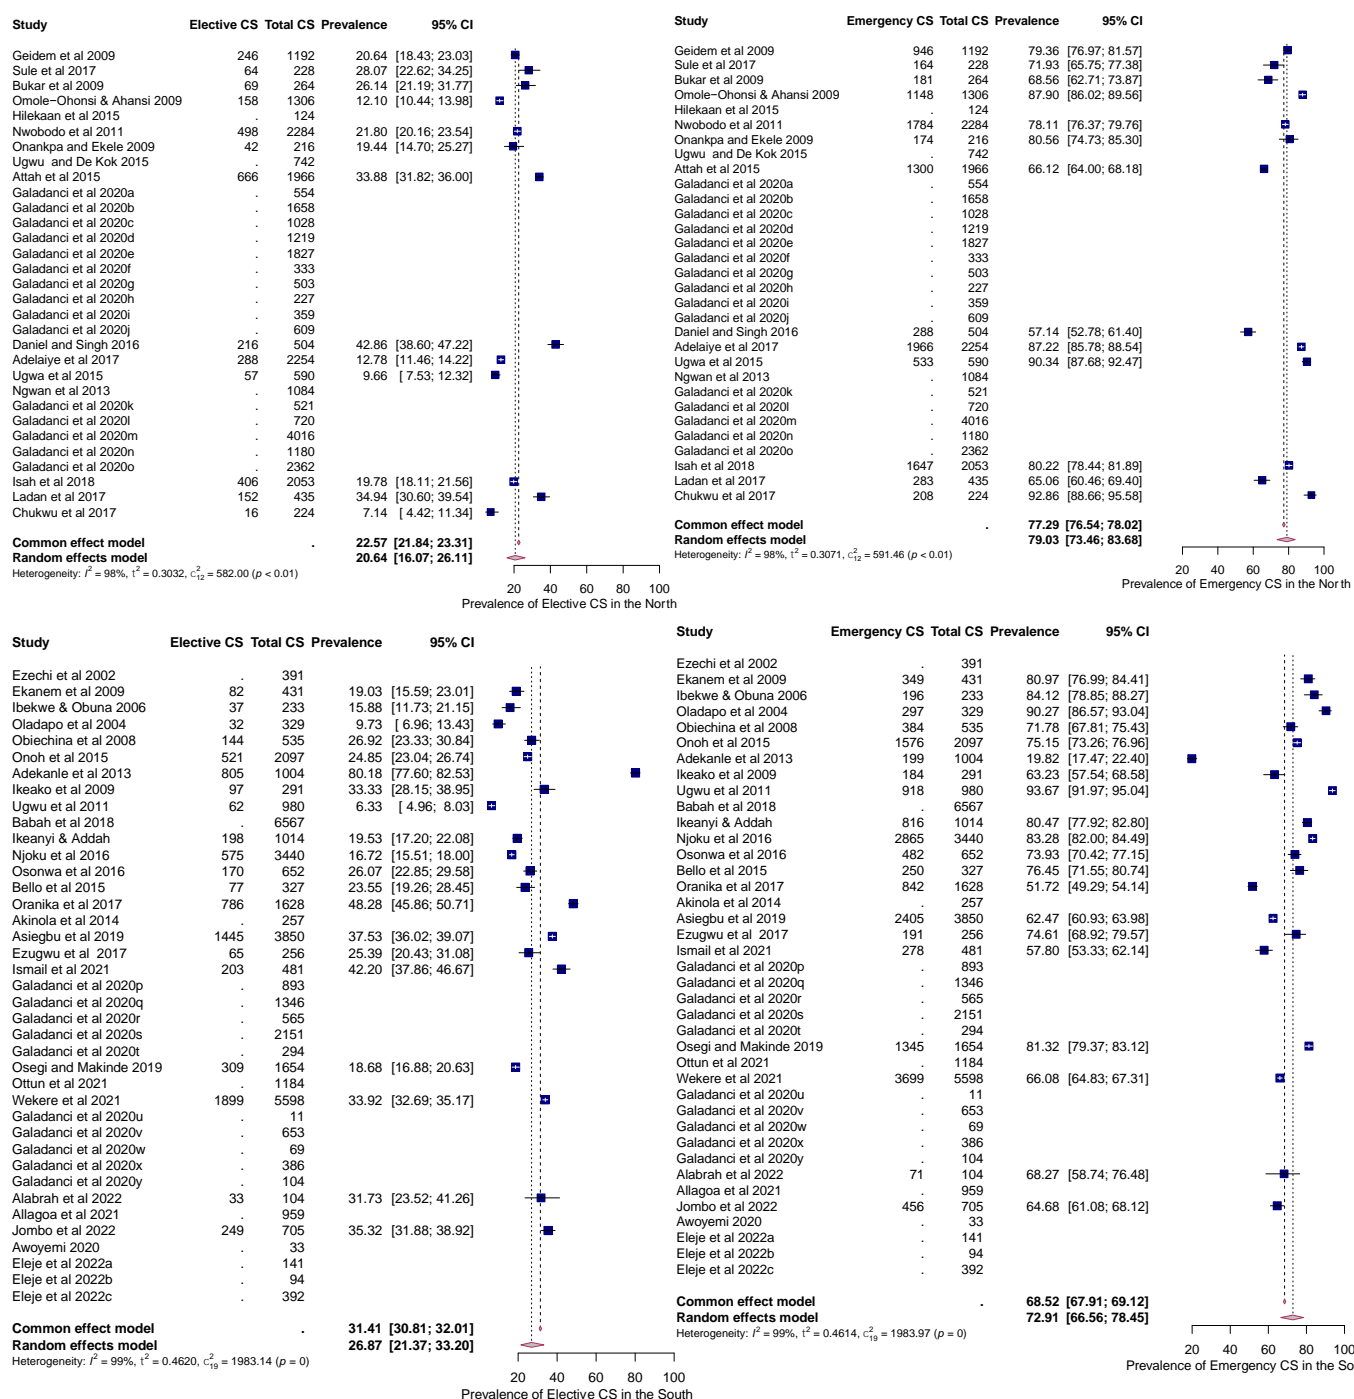

**Study period: pre- and post-WHO statement**

The prevalence of CS increased from 18.76% to 29.60% after the WHO statement was released. Papers with overlapping years in the middle of the forest plot

**Figure S3:** Forest plot of the prevalence of caesarean section prior to and after the WHO statement

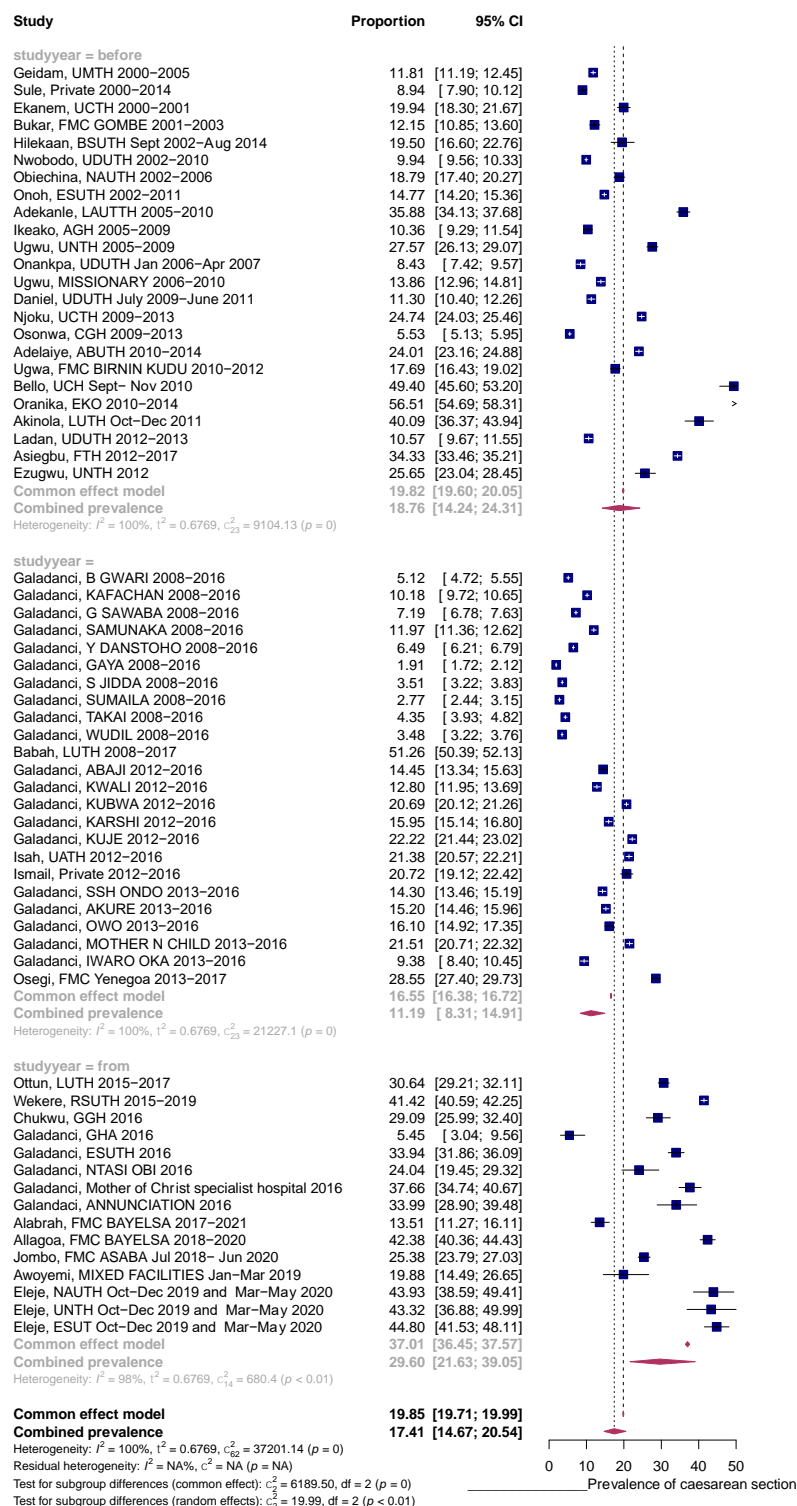

### Moderator effect of study period

The study period was found to be a significant moderator of the prevalence of CS.

**Figure S4:** Scatter plot to show the moderating effect of study period

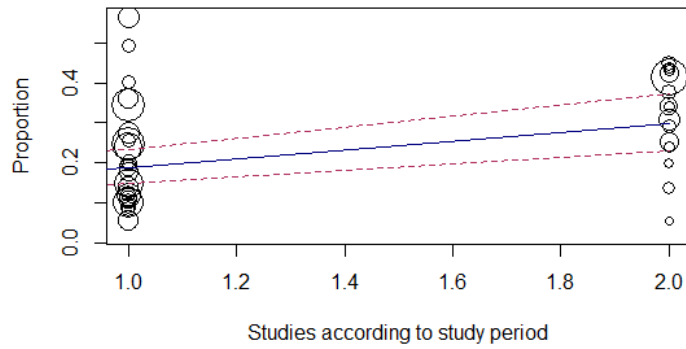

### Hierarchy of facility service

Hierarchy/level of facility (secondary or tertiary) was not a significant influence on the prevalence of caesarean section.

**Figure S5:** Scatter plot to show the moderating effect of the class of facility service

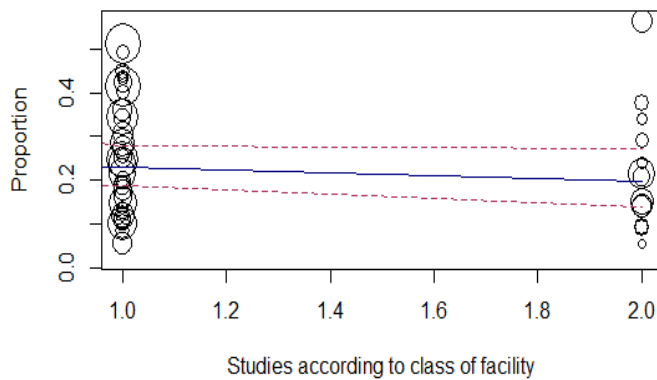

### Type of facility

Facility type (public or private) was not a significant influence on the prevalence of caesarean section.

**Figure S6:** Scatter plot investigating the moderator effect of the type of facility

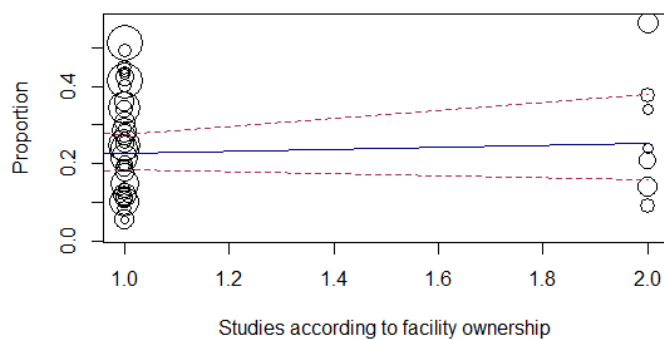

Supplement: 12978_2023_1598_MOESM1_ESM.pdf [file 12978_2023_1598_MOESM1_ESM.pdf]
